# Supplementary material for: Evaluation of Four Ground-based Retrievals of Cloud Droplet Number Concentration in Marine Stratocumulus with Aircraft In Situ Measurements
Source: Copernicus journal article supplement (doi:10.5194/egusphere-2023-1364), 2023-08-01
Supplement: Supplementary file 1 [file egusphere-2023-1364-supplement.pdf]

*Supplement of*

**Evaluation of Ground-based Retrievals of Cloud Droplet Number Concentration in Marine Stratocumulus with *In Situ* Aircraft Measurements**

Damao Zhang<sup>1</sup>, Andrew Vogelmann<sup>2</sup>, Fan Yang<sup>2</sup>, Edward Luke<sup>2</sup>, Pavlos Kollias<sup>2, 3</sup>, Zhien Wang<sup>4</sup>, Peng Wu<sup>1</sup>, William I. Gustafson<sup>1</sup>, Fan Mei<sup>1</sup>, Susanne Glienke<sup>1</sup>, Jason Tomlinson<sup>1</sup>, Neel Desai<sup>5</sup>

<sup>1</sup>Pacific Northwest National Laboratory, Richland, Washington, USA

<sup>2</sup>Brookhaven National Laboratory, Upton, New York, USA

<sup>3</sup>School of Marine and Atmospheric Sciences, Stony Brook University, New York, USA

<sup>4</sup>College of Arts and Sciences, University of Colorado Boulder, CO, USA

<sup>4</sup>Department of Meteorology and Climate Science, San Jose State University, CA, USA

Table S1 Compare  $r_{em}$  retrievals and *in situ* probe measurements for the 12 selected flight days.

Numbers in parathesis is the absolute relative difference of  $r_{em}$  with respect to  $r_{em\_FCDP}$ .

| <b>Date</b> | $r_{em\_FCDP}$<br>$\mu\text{m}$ | $r_{em\_CAS}$<br>$\mu\text{m}$ | $r_{em\_mpl}$<br>$\mu\text{m}$ | $r_{em\_rl}$<br>$\mu\text{m}$ | $r_{em\_radar}$<br>$\mu\text{m}$ | $r_{em\_vap}$<br>$\mu\text{m}$ |
|-------------|---------------------------------|--------------------------------|--------------------------------|-------------------------------|----------------------------------|--------------------------------|
| 2017/06/21  | 9.6                             | 9.4 (-0.2)                     | 10.8 (1.2)                     | n/a                           | 9.7 (0.1)                        | 7.8 (-1.8)                     |
| 2017/06/28  | 6.6                             | 7.6 (1.0)                      | 10.9 (4.3)                     | 13.7 (7.1)                    | 9.0 (2.4)                        | 8.0 (1.4)                      |
| 2017/06/30  | 6.4                             | 7.2 (0.8)                      | 6.5 (0.1)                      | 6.0 (-0.4)                    | 9.1 (2.7)                        | 7.3 (0.9)                      |
| 2017/07/06  | 9.6                             | 10.0 (0.4)                     | 9.0 (-0.6)                     | 8.5 (-1.1)                    | 10.4 (0.8)                       | 9.8 (0.2)                      |
| 2017/07/08  | 7.8                             | 8.4 (0.6)                      | 9.8 (2.0)                      | 12.7 (4.9)                    | 9.1 (1.3)                        | 8.0 (0.2)                      |
| 2017/07/18  | 12.7                            | 13.1 (0.4)                     | 13.5 (0.8)                     | 15.9 (3.2)                    | 12.7 (0.1)                       | 12.9 (0.2)                     |
| 2018/01/19  | 12.5                            | 12.6 (0.1)                     | 13.5 (1.0)                     | 11.9 (-0.6)                   | 11.6 (-0.9)                      | 14.0 (1.5)                     |
| 2018/01/25  | 11.6                            | 11.6 (0.0)                     | 13.6 (2.0)                     | 11.1 (-0.5)                   | 12.5 (0.9)                       | 14.8 (3.2)                     |
| 2018/01/26  | 11.0                            | 10.8 (-0.2)                    | 11.2 (0.2)                     | 9.5 (-1.4)                    | 12.0 (1.0)                       | 10.3 (-0.7)                    |
| 2018/01/30  | 9.5                             | 9.4 (-0.1)                     | 11.1 (1.6)                     | 9.5 (0.0)                     | 10.7 (1.2)                       | 11.6 (2.1)                     |
| 2018/02/07  | 10.0                            | 9.8 (-0.2)                     | 9.9 (-0.1)                     | 7.5 (-2.6)                    | 10.5 (0.5)                       | 10.3 (0.3)                     |
| 2018/02/12  | 8.1                             | 8.4 (0.3)                      | 9.9 (1.8)                      | 7.9 (-0.2)                    | 9.6 (1.5)                        | 9.5 (1.4)                      |

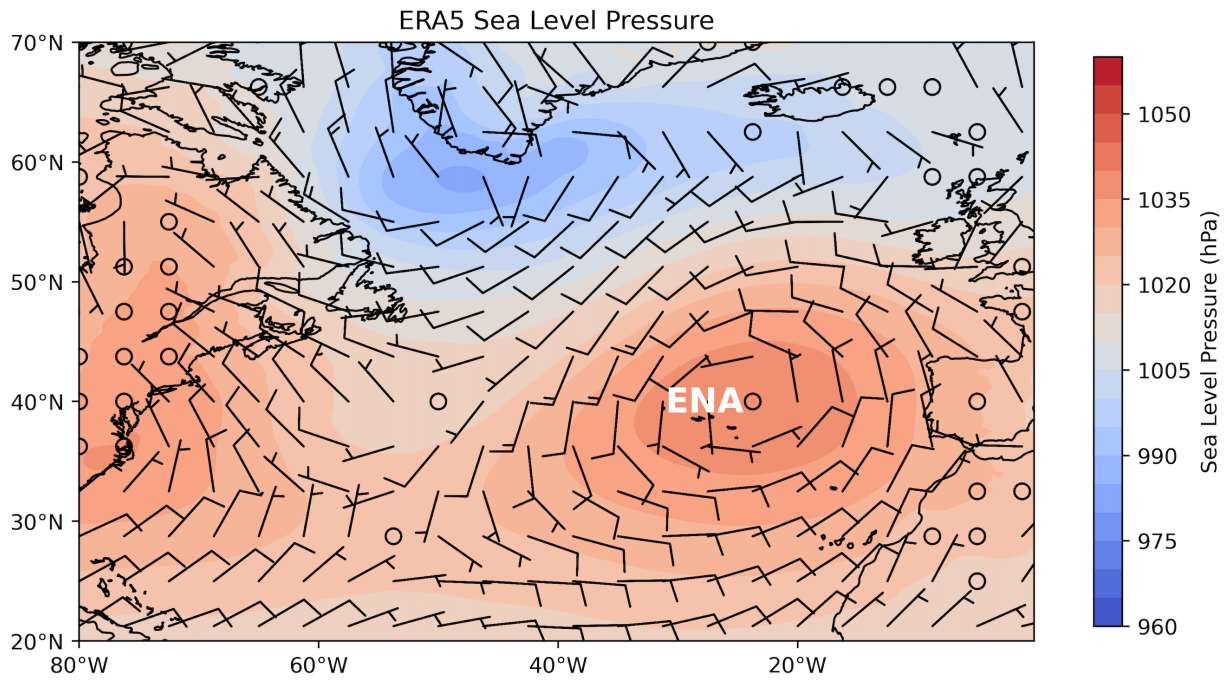

Fig. S1. The average mean sea level pressure and 10-meter wind across the ENA observatory between 5:00 UTC January 25 and 12 UTC January 27, 2018 based on the hourly ECMWF ERA5 reanalysis data (Hersbach et al., 2020).

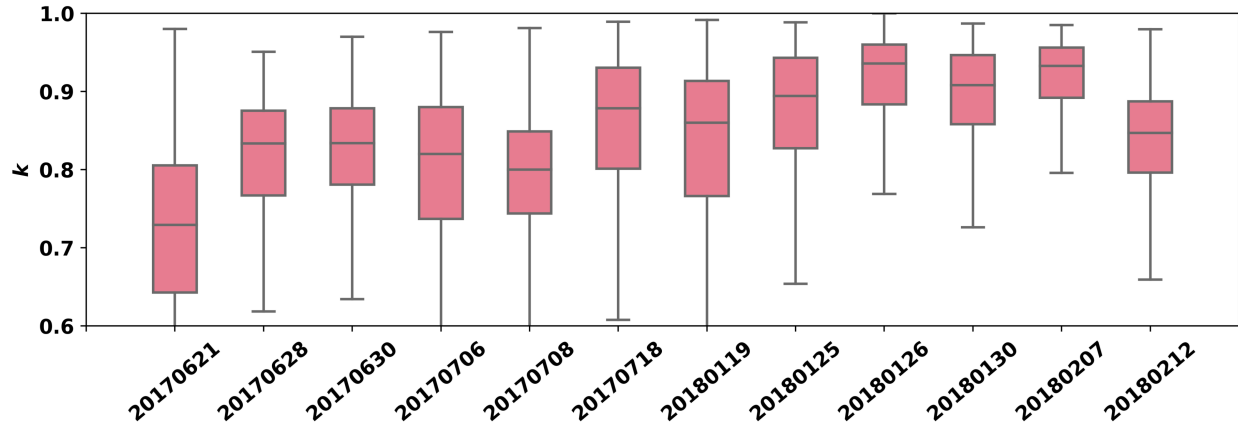

Fig. S2. The  $k$  parameter values during the 12 selected flight days.

## References

Hersbach, H, Bell, B, Berrisford, P, et al. The ERA5 global reanalysis. *Q J R Meteorol Soc.* 2020; 146: 1999– 2049. <https://doi.org/10.1002/qj.3803>.
